# Supplementary material for: A Distinct Role of the Autonomic Nervous System in Modulating the Function of Lymphatic Vessels under Physiological and Tumor-Draining Conditions
Source: PubMed Central journal article supplement — Cell Rep. 2019 Jun 11;27(11):3305–3314.e13. doi: 10.1016/j.celrep.2019.05.050 (PMC6581737; doi:10.1016/j.celrep.2019.05.050), 2019-06-11
Supplement: mmc1.pdf [file mmc1.pdf]

**Cell Reports, Volume 27**

**Supplemental Information**

**A Distinct Role of the Autonomic Nervous System  
in Modulating the Function of Lymphatic Vessels  
under Physiological and Tumor-Draining Conditions**

**Samia B. Bachmann, Denise Gsponer, Javier A. Montoya-Zegarra, Martin Schneider, Felix Scholkmann, Carlotta Tacconi, Simon F. Noerrelykke, Steven T. Proulx, and Michael Detmar**

# Supplemental Figure 1

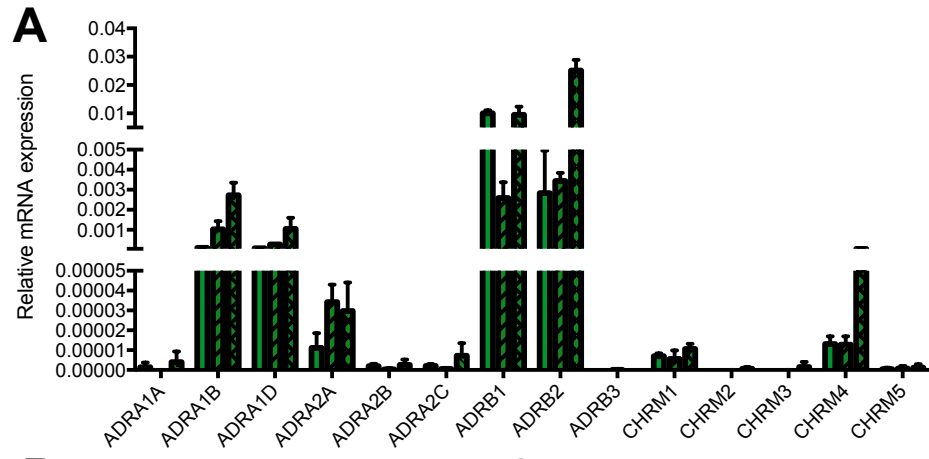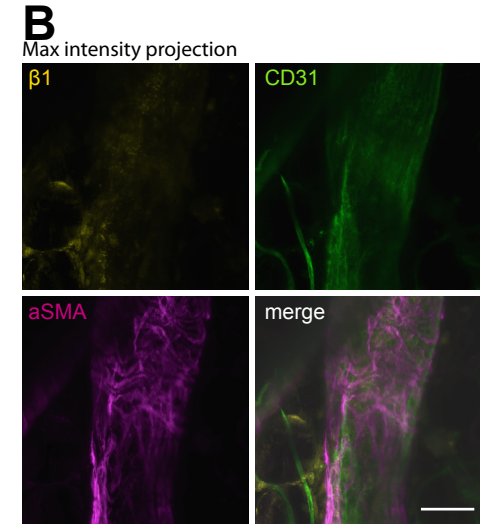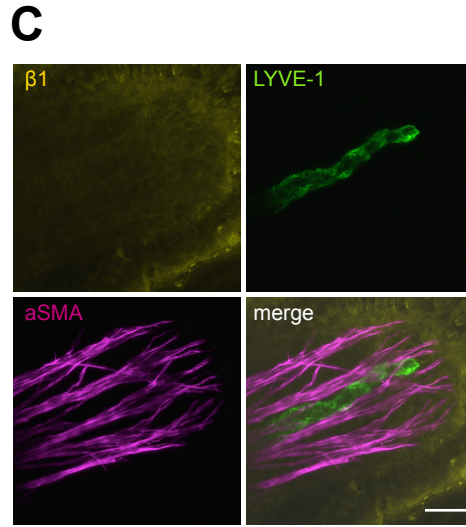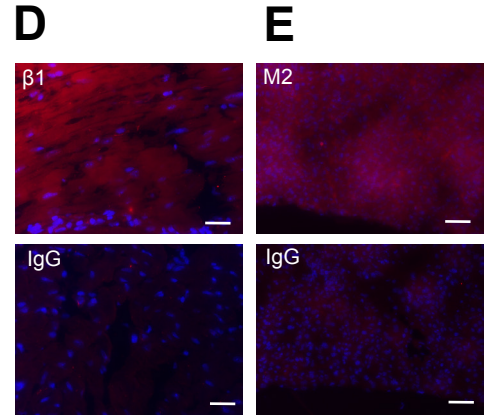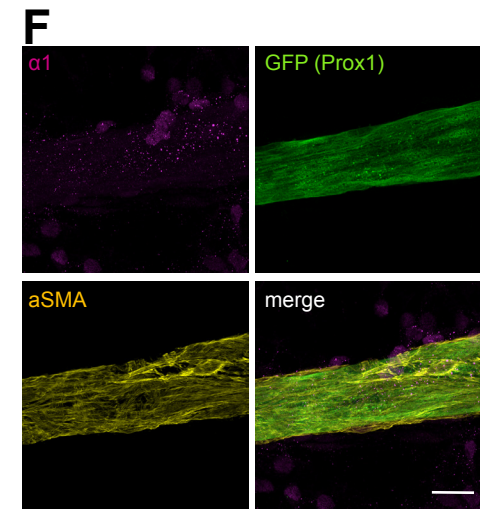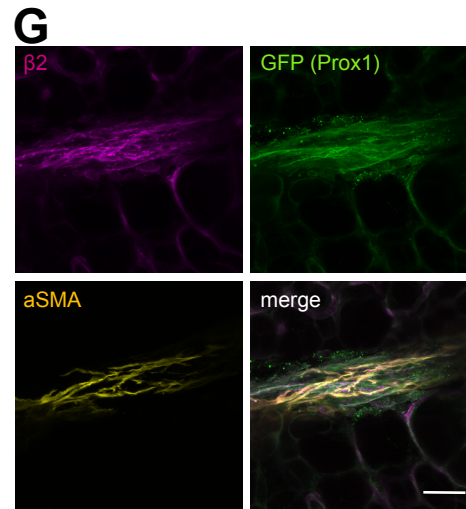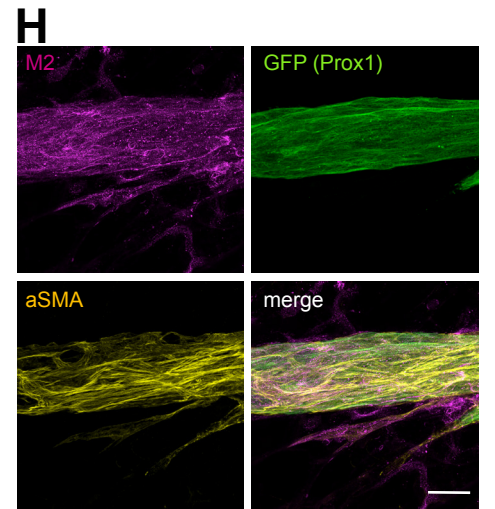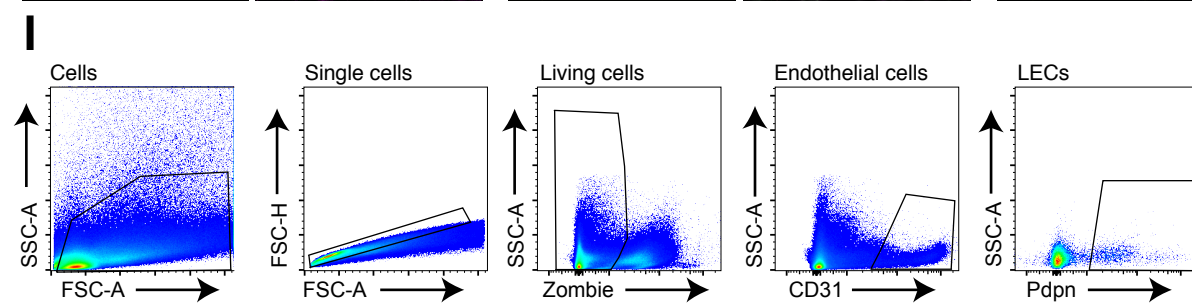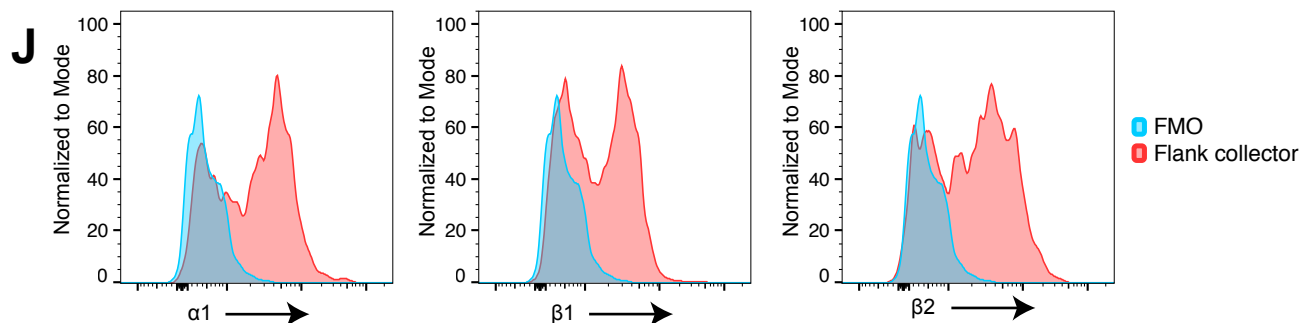

**Figure S1. Related to Figure 1. Lymphatic vessels *in vivo* express low levels of beta 1 receptors.** (A) qPCR-based detection of adrenergic  $\beta_1$  and  $\beta_2$  receptor mRNA in 3 additional primary human LEC lines, shown as differently filled columns, n=3 replicates (B and C) Fluorescent whole mount images show no expression of  $\beta_1$  receptors in CD31+ flank collector or LYVE-1+ lacteal with their aSMA+ smooth muscle cells. (D and E): Positive control stainings of sectioned of heart (D) and liver (E) tissue for  $\beta_1$  and M<sub>2</sub> antibodies, including IgG controls. (F-H) Fluorescent whole mount images of mesenteric collectors show no expression of  $\alpha_1$  receptors, but presence of  $\beta_2$  and M<sub>2</sub> receptors on both Prox1+ LECs and aSMA+ smooth muscle cells. (I) Gating strategy used to obtain living, CD31+ podoplanin+ LECs of flank collecting vessels. (J) Expression profiles of  $\alpha_1$ ,  $\beta_1$  and  $\beta_2$  receptors on flank collector LECs compared to their FMOs (fluorescence minus one), respectively, n = 1. Images were obtained using confocal microscopy. Scale bars: 50  $\mu$ m (B and E), 25  $\mu$ m (C, D, F-H). Data in (A) are represented as mean  $\pm$  SD.

## Supplemental Figure 2

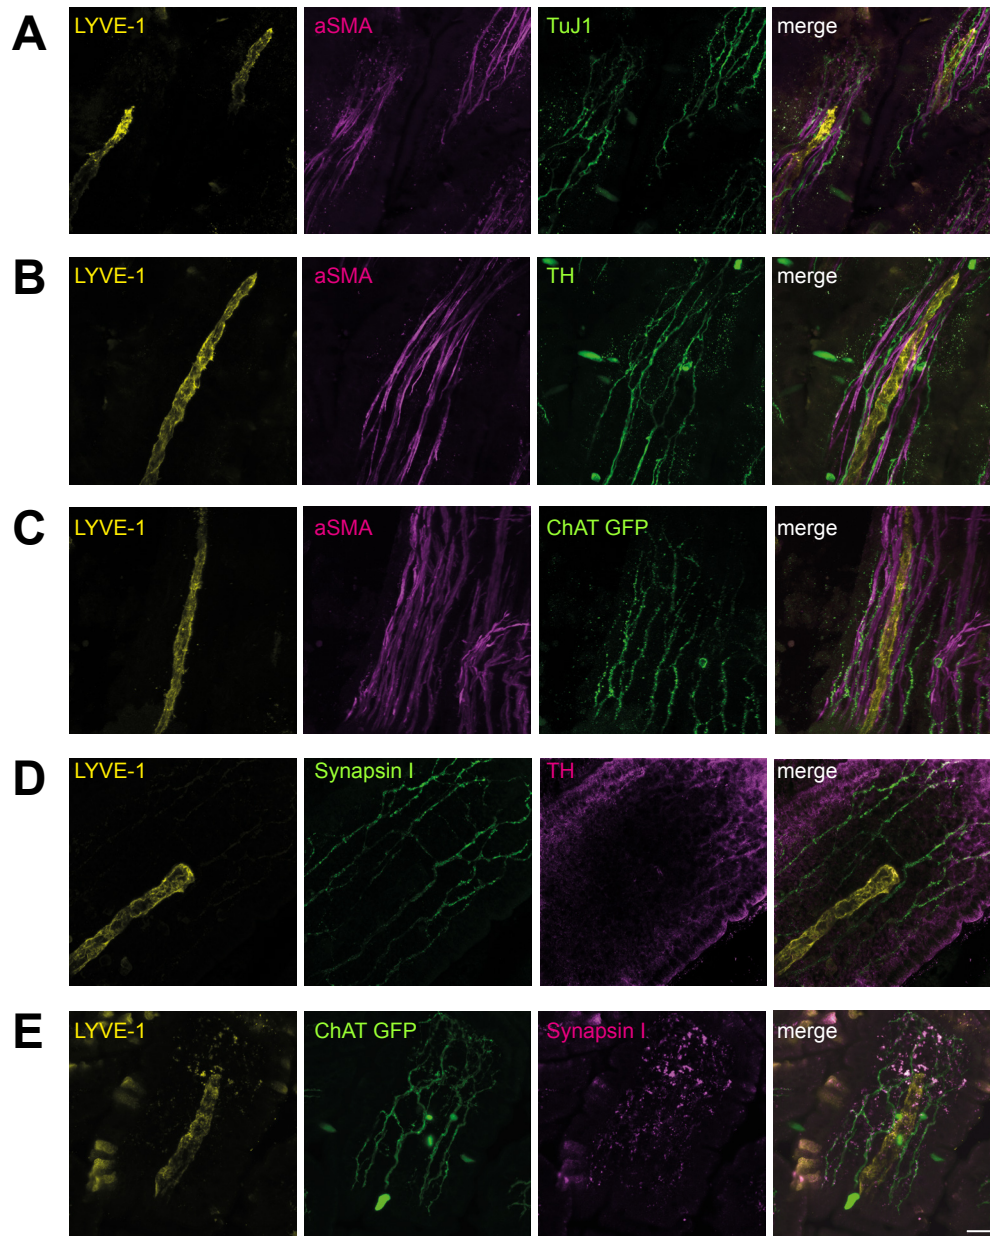

**Figure S2. Related to Figure 2. Sympathetic and parasympathetic nerves form synapses close to lacteals.** (A) Nerves (TuJ1+) are tightly associated with LYVE-1+ lacteals and their aSMA+ smooth muscle cells. (B and C) The innervation by sympathetic (tyrosine hydroxylase, TH+) and parasympathetic (cholinacetyl transferase, ChAT+) nerves. (D and E) Both TH+ and ChAT+ nerves form synapses (Synapsin I+) associated with the lacteal itself and with the smooth muscle cells. Images were obtained using confocal microscopy. Scale bar: 25  $\mu$ m.

# Supplemental Figure 3

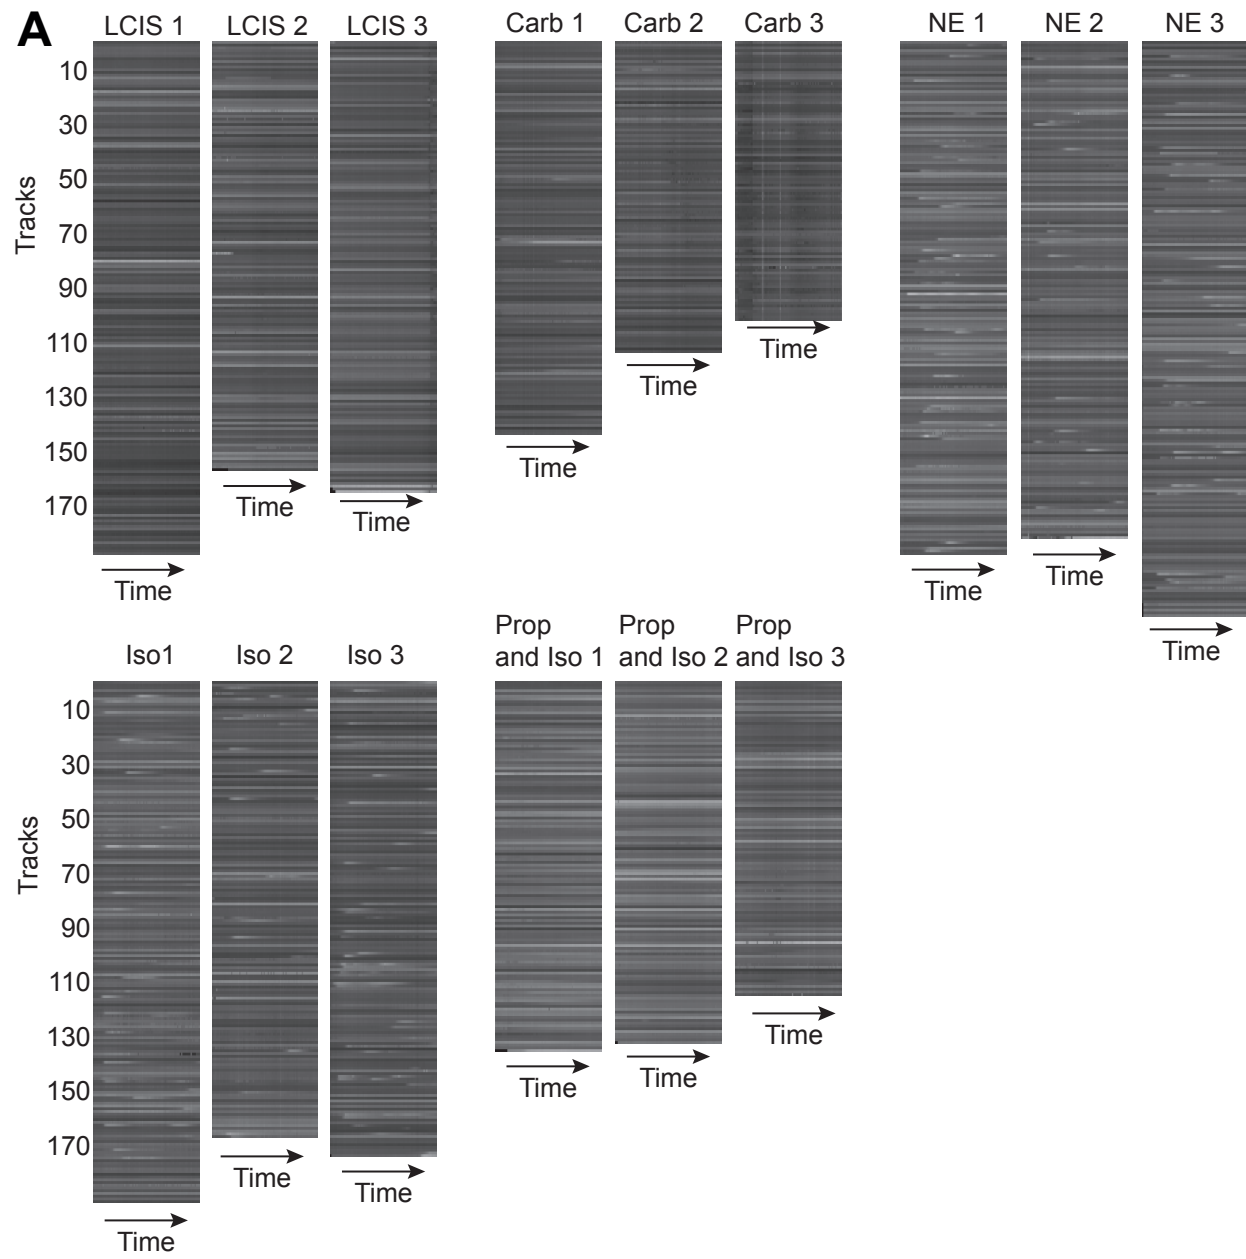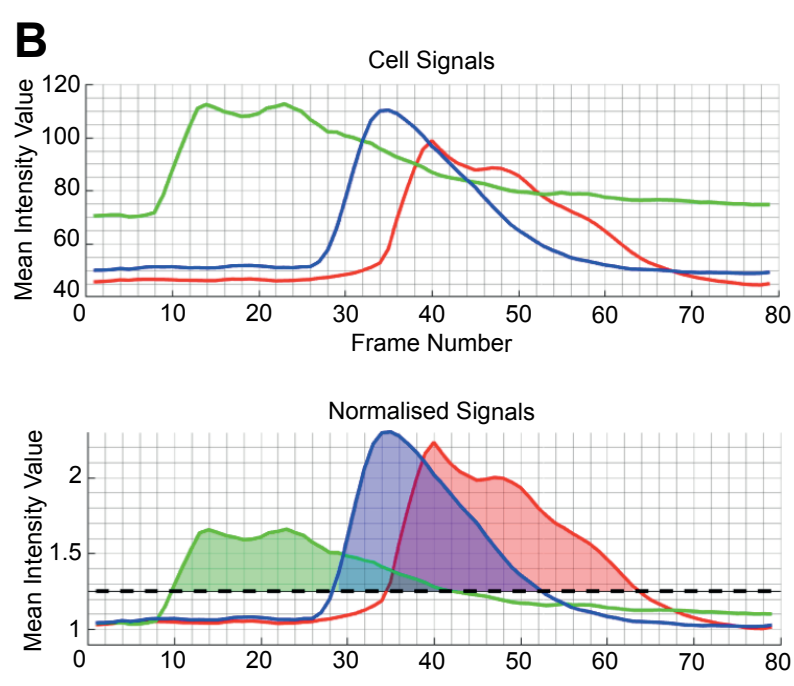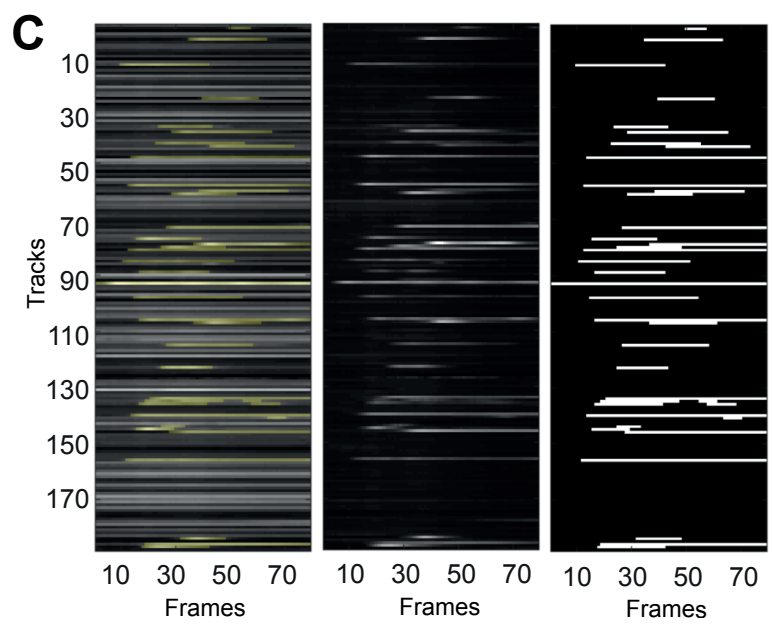

**Figure S3. Related to Figure 3. Increased Ca<sup>2+</sup> levels in cultured hLECs upon activation of  $\beta$  receptors.**

Raw data from *in vitro* Ca<sup>2+</sup> imaging. Three independent replicates are shown for each treatment. Each horizontal line represents one tracked cell. Activation of cells can be seen by changes of the grey scale of a cell over time. LCIS=live cell imaging solution, Carb=carbachol, NE=norepinephrine, Iso=isoproterenol, Prop=propranolol.

## Supplemental Figure 4

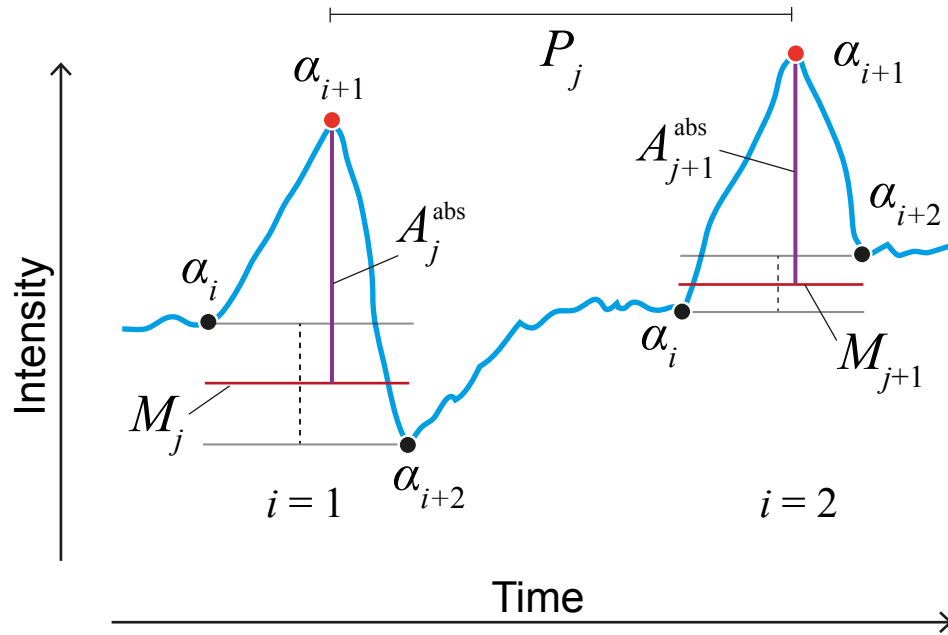

**Figure S4. Related to Figure 5. Algorithm for quantification of *in vivo* contractility experiments.** Visualization of a typical fluorescence signal (schematic) with the mathematical notations used by the signal processing method developed in Matlab. Each contraction is defined by three points ( $\alpha_i$ ,  $\alpha_{i+1}$ ,  $\alpha_{i+2}$ ) with its amplitude ( $A^{\text{abs}}$ ) according to the mean ( $M_j$ ) between the starting and ending point of the contraction. Frequency is defined as the time between two peaks ( $P_j$ ).

# Supplemental Figure 5

**A**

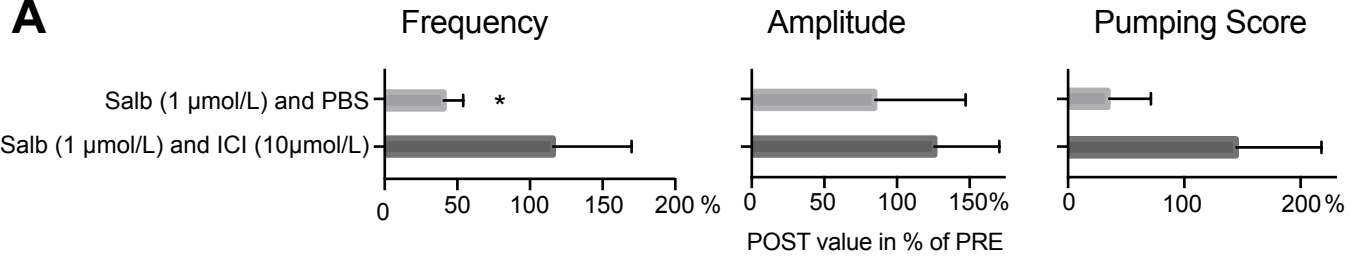

**B**

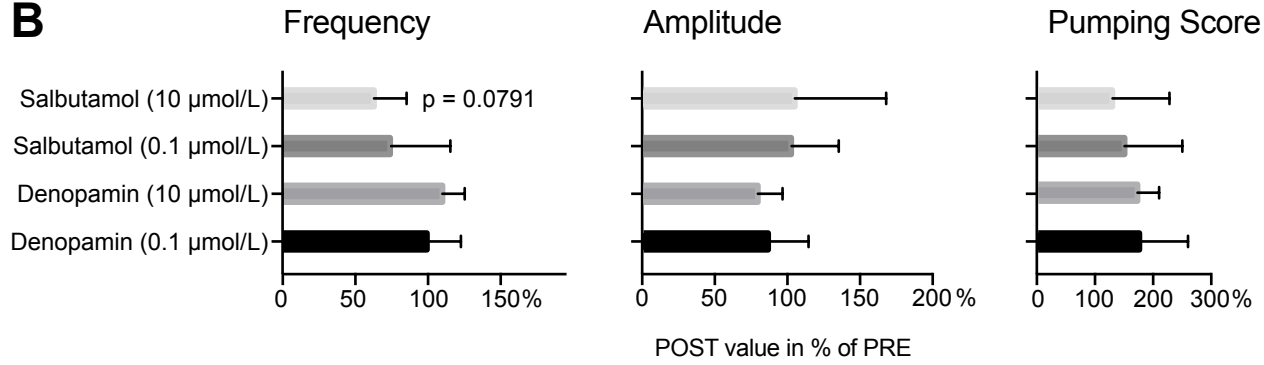

**C**

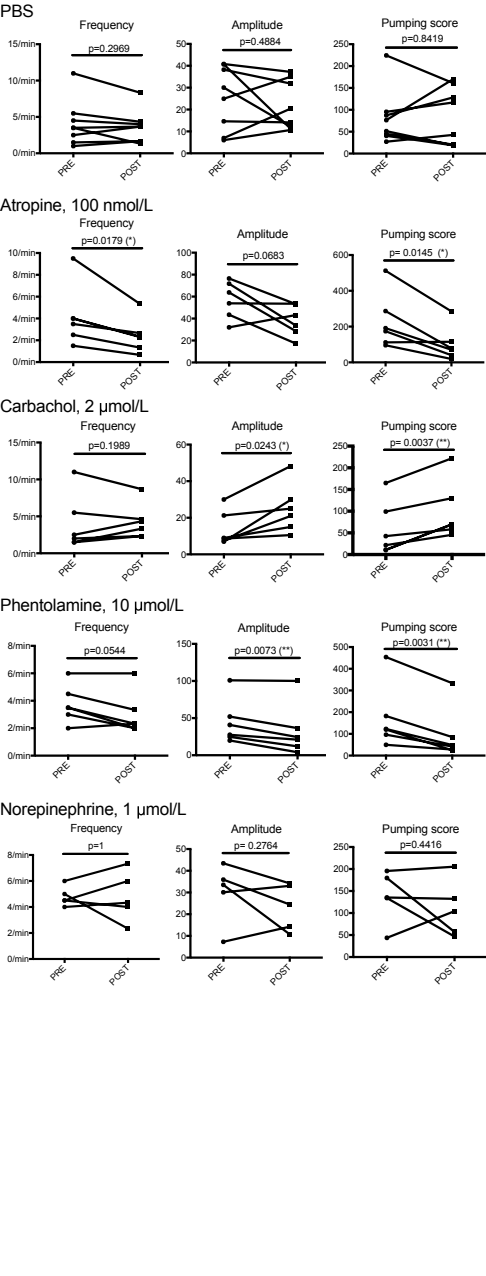

**D**

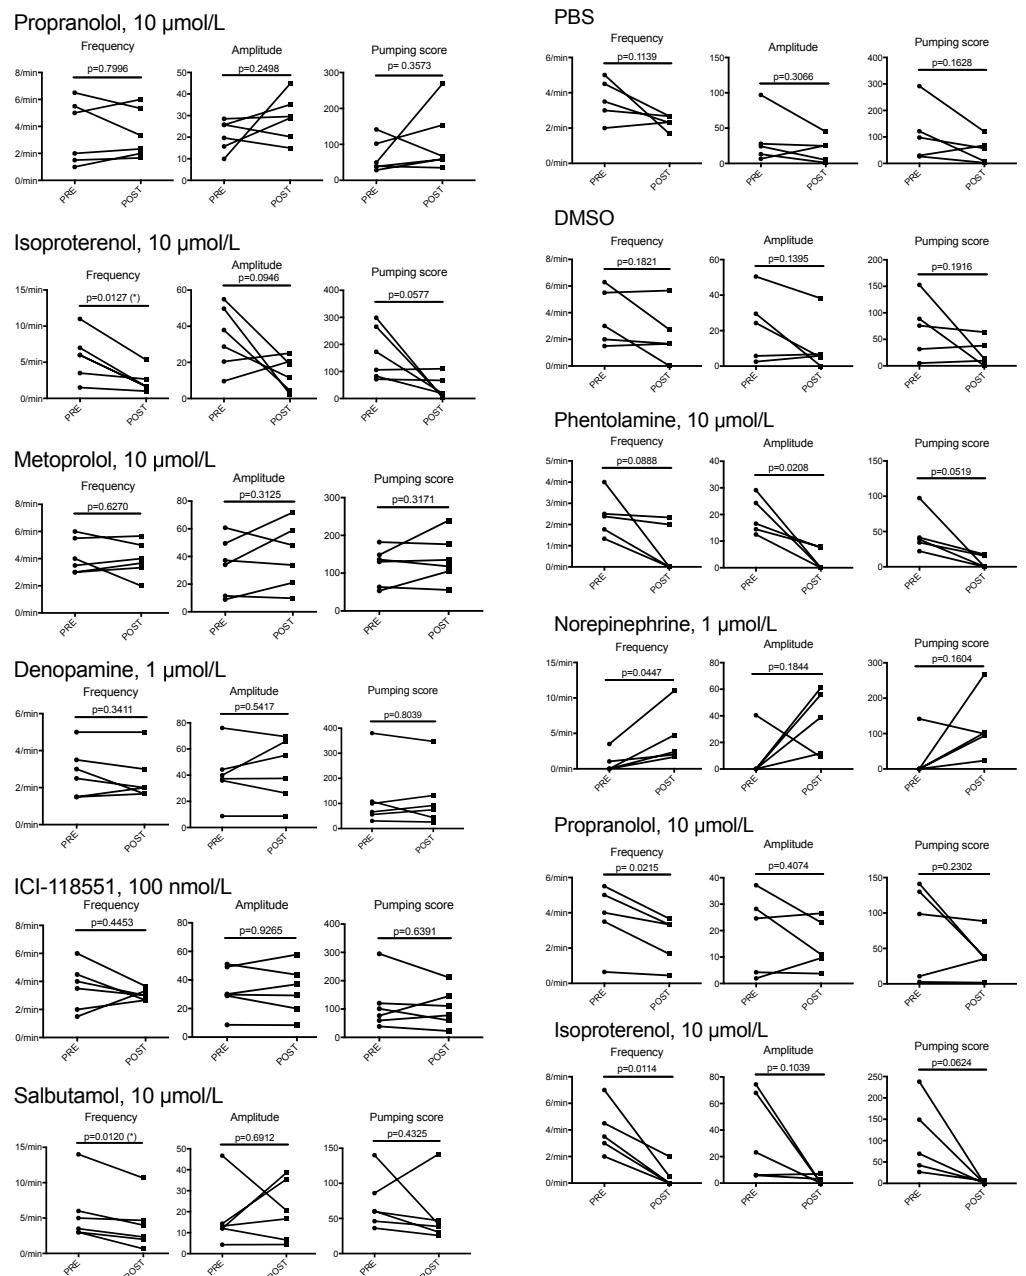



**Figure S5. Related to Figure 5. Raw data of *in vivo* contractility experiments (flank assays).** (A) Specificity testing of Salbutamol by a second treatment of the exposed vessel with either PBS or ICI. Shown are the post treatment values in % of pre-treatment values of mice under injection anesthesia (ketamine, xylazine, acepromazine), n=4 vessels. (B) Additional concentrations of  $\beta_1$  and  $\beta_2$  agonists in mice under injection anesthesia, shown are post treatment values in % of pre-treatment values, n=5 vessels. (C) Raw data of flank assay experiments using injection anesthesia. All pre (minute 0-2) and post treatment (minutes 4-7) values are shown; n=6 vessels per treatment. (D) Raw data for flank assay experiments using isoflurane anesthesia; n=5 vessels per treatment. Two-tailed, paired Student's t-test.

# Supplemental Figure 6

## A Atropine, 100 nmol/L

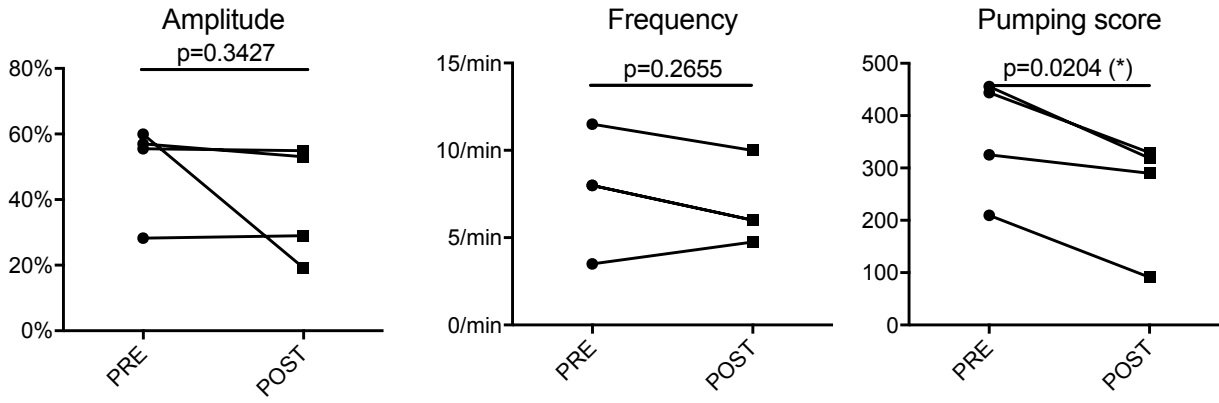

## B Phentolamine, 10 $\mu$ mol/L

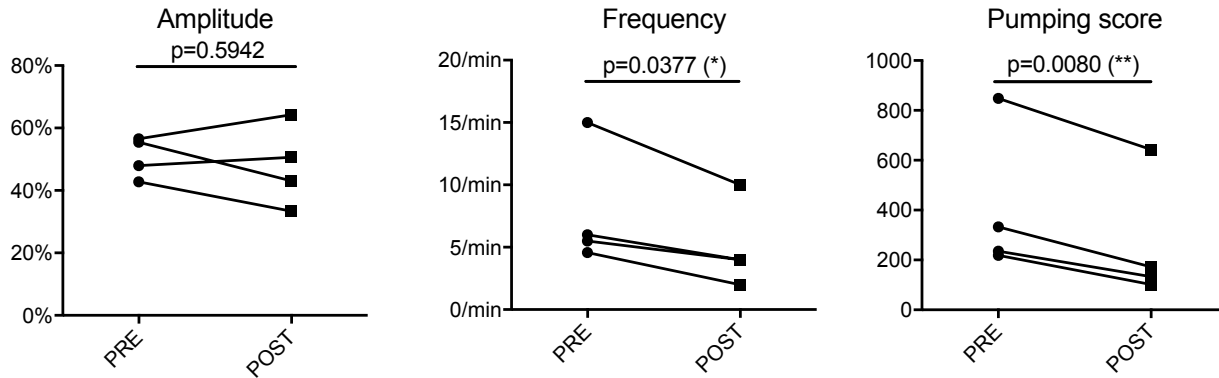

## C Isoproterenol, 10 $\mu$ mol/L

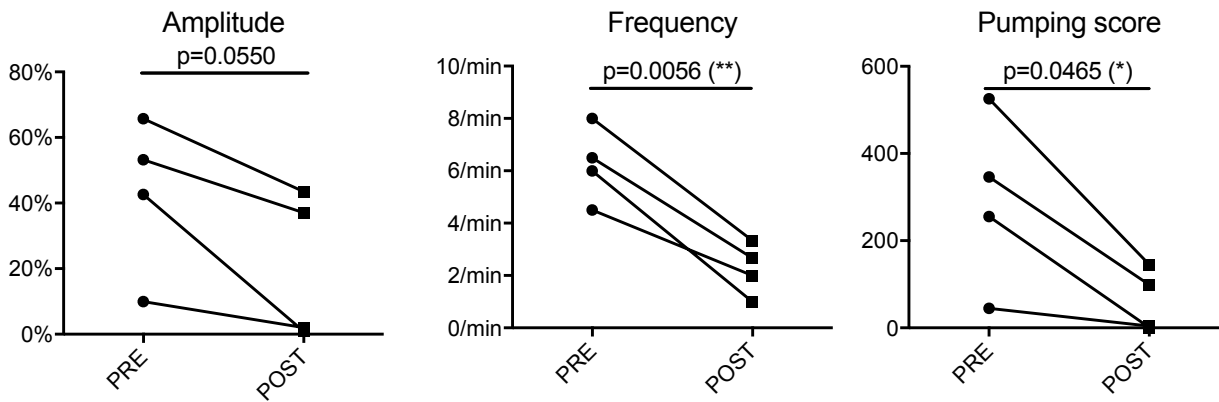

**Figure S6. Related to Figure 6. Raw data of *in vivo* contractility experiments in tumor bearing mice.** All pre (minute 0-2) and post treatment (minutes 4-7) values are shown; n=4 vessels per treatment, atropine (A), phentolamine (B), isoproterenol (C). Two-tailed, paired Student's t-test.

**Table S1:** Antagonists and agonists used in imaging and in vitro assays. Related to Figure 3-6.

| Compound                          | Company       | Order number |
|-----------------------------------|---------------|--------------|
| DL-Norepinephrine hydrochloride   | Sigma-aldrich | A7256        |
| Phentolamine hydrochloride        | Sigma-aldrich | P7547        |
| Atropine sulfate salt monohydrate | Sigma-aldrich | A0257        |
| Carbachol                         | Millipore     | 212385       |
| (-)-Isoproterenol hydrochloride   | Sigma-aldrich | I6504        |
| (±)-Propranolol hydrochloride     | Sigma-aldrich | P0884        |
| R(-)-Denopamine                   | Sigma-aldrich | D7815        |
| (±)-Metoprolol (+)-tartrate salt  | Sigma-aldrich | M5391        |
| Salbutamol                        | Sigma-aldrich | S8260        |
| ICI-118,551 hydrochloride         | Sigma-aldrich | I127         |

**Table S2:** Primary antibodies used. Related to Figure 1, 2, 5, 6, S1, S2.

| Antigen                             | Host    | Company       | Order number |
|-------------------------------------|---------|---------------|--------------|
| Immunofluorescence                  |         |               |              |
| alpha-1 adrenergic receptor         | goat    | Santa Cruz    | sc-1477      |
| beta-1 adrenergic receptor          | rabbit  | abcam         | ab3442       |
| beta-2 adrenergic receptor          | chicken | abcam         | ab13989      |
| muscarinic acetylcholine receptor 2 | rabbit  | abcam         | ab109226     |
| muscarinic acetylcholine receptor 3 | rabbit  | Santa Cruz    | sc-9108      |
| Synapsin-1                          | rabbit  | invitrogen    | 51-5200      |
| Tyrosine Hydroxylase                | sheep   | R&D           | AF7566       |
| Tyrosine Hydroxylase                | rabbit  | invtrogen     | P21962       |
| III beta Tubulin                    | rabbit  | BioLegend     | 801201       |
| GFP                                 | chicken | Aves          | GFP-1010     |
| CD31                                | rat     | BD Bioscience | 550274       |
| alpha smooth muscle actin           | mouse   | Sigma-Aldrich | C6198        |
| LYVE-1                              | rabbit  | AngioBio      | 11-034       |
| LYVE-1                              | rat     | ReliaTech     | 103-M130     |
| Western Blot                        |         |               |              |
| eNOS                                | rabbit  | ThermoFisher  | PA1-037      |
| Phospho-eNOS (Ser1177)              | rabbit  | CellSignaling | 9571         |
| beta-1 adrenergic receptor          | rabbit  | abcam         | ab3442       |
| beta-2 adrenergic receptor          | chicken | abcam         | ab13989      |
| Tubulin                             | mouse   | Sigma-Aldrich | T9026V       |
| FACS                                |         |               |              |
| alpha-1 adrenergic receptor         | rabbit  | abcam         | ab137123     |
| beta-1 adrenergic receptor          | rabbit  | abcam         | ab3442       |
| beta-2 adrenergic receptor          | rabbit  | abcam         | ab61778      |
| CD31-APC                            | rat     | BD Bioscience | 551262       |
| Podoplanin-PE-Cy7                   | hamster | eBioscience   | 25-5381-82   |

**Table S3:** Secondary antibodies used. Related to Figure 1, 2, 5, 6, S1, S2.

| Antigen            | Conjugate | Host   | Company                | Order number |
|--------------------|-----------|--------|------------------------|--------------|
| Immunofluorescence |           |        |                        |              |
| goat               | Alexa 594 | donkey | invitrogen             | A-11058      |
| rabbit             | Alexa 488 | donkey | invitrogen             | A-21206      |
| rabbit             | Alexa 647 | donkey | invitrogen             | A-31573      |
| chicken            | Alexa 488 | donkey | Jackson ImmunoResearch | 703-545-1551 |
| sheep              | Alexa 594 | donkey | invitrogen             | A-11016      |
| rat                | Alexa 488 | donkey | invitrogen             | A-21208      |
| Western Blot       |           |        |                        |              |
| rabbit             | HRP       | donkey | GE Healthcare          | NA9340V      |
| mouse              | HRP       | sheep  | GE Healthcare          | NA931        |
| FACS               |           |        |                        |              |
| rabbit             | PE        | donkey | BioLegend              | 406421       |

**Table S4:** Used primers of neurotransmitter receptors. Related to Figure 1, S1.

| Gene   | Primer                          |                            |
|--------|---------------------------------|----------------------------|
|        | fwd                             | rev                        |
| ADRA1A | TAGTCATGCCCATTTGGGTC            | AGCTGTTTAGATATCCGAGCC      |
| ADRA1B | CTTGGCTCCTTGTCTCCA              | AGCTGTTGAAGTAGCCAG         |
| ADRA1D | TTTCTTCTTTGTCTGCCC              | AGATGACCTTGAAGAGCGCC       |
| ADRA2A | TTCTTCTGGTTCGGCTACTG            | GGTTGAAGATGGTGTAGATGAC     |
| ADRA2B | TTCTTCTGGATCGGCTACTG            | GGTTGAAGATGGTGTAGATAACAG   |
| ADRA2C | TTCTCATCGTCTTACCCG              | CCAGGAAGAGGTTCTGTGG        |
| ADRB1  | ATCATGGCCCTTCGTGTACC            | TCGATCTTCTTACCTGCT         |
| ADRB2  | GTCTACTCCAGGGTCTTTCAG           | CCTCAGATTTGTCAAITCTTCTGG   |
| ADRB3  | TCAACCCGCTCATCTACTG             | TCAGGCCCTAAGAAACTCCC       |
| CHRM1  | CTTCCCTTTCTCCCTCCC              | TGTTCAITGGTGGCTAGGTTG      |
| CHRM2  | GATCAAGGGAGAAAGAGAACC           | AGTCCTTTGTGGGTTCAAG        |
| CHRM3  | CAGTTCTTGGTAGATTACTATGTC        | TGTTTGAAACAAAAGGCGA        |
| CHRM4  | GAAGGAGAAGAAAAGCCAAGAC          | GACGCTCTGCTTCATTAGTG       |
| CHRM5  | GTCTCGAAGCTTACTAATTTCCA         | AAITGATTTCTAGGTTCTCTGG     |
| GAPDH  | GAA ATC CCA TCA CCA TCT TCC AGG | GAG CCC CAG CCT TCT CCA TG |
| CX40   | AAI ACA ACG GCT ATC ACG         | AGC TTC TGG CTT TCT TTA C  |
